# Supplementary material
Source: PubMed Central journal article supplement (PMC7791615)

1 **Supplemental Figure S1- GREB1 has a dose-dependent effect on proliferation in breast cancer**  
2 **cells.** MCF7 (A) and ZR-75-1 (B) cells were transduced with GFP or increasing amounts of GREB1  
3 adenovirus. The relative number of cells were measured on Day 0 and Day 5 my alamar blue assay.  
4 Data depicts 4 biological replicates with standard deviations. B. \*\* p < 0.01, \*\*\* p < 0.001, \*\*\*\* p <  
5 0.00001.

6 **Supplemental Figure S2- Different mutations in the PI3K pathway have varying levels of Akt**  
7 **activity in breast cancer cell lines.** A. MCF7, ZR-75-1, and T47D cells were serum starved for 16 hours  
8 before stimulation with 1 ng/mL of EGF for 1 hour. Cell lysates were harvested and analyzed by  
9 immunoblot for the indicated proteins. B. Quantification of the phosphor-GSK3 $\beta$  activity depicted in  
10 Figure 3B.

11 **Supplemental Figure S3- GREB1 overexpression induces Akt hyperactivation at the plasma**  
12 **membrane.** MCF7 cells were transduced with adenovirus expressing GFP or GREB1. The cells were  
13 then cultured in serum-free media for 16 hours before being stimulated with 1 ng/mL EGF for 0 or 5  
14 minutes. Cells were fixed and stained for DAPI and A) Akt or B) p-Akt (Thr308). Immunofluorescence  
15 microscopy was used to visualize the activation and localization of Akt.

16 **Supplemental Figure S4- Endogenous GREB1 re-localizes to the cytoplasm under growth-**  
17 **stimulatory conditions.** A) MCF7 cells were serum starved for 4 hours and stimulated with 1 ng/mL  
18 EGF for 0, 5, or 15 minutes. Cells were fixed and stained for DAPI and endogenous GREB1.  
19 Immunofluorescence microscopy was used to visualize GREB1 localization. B) Cytoplasmic and nuclear  
20 fractions were extracted from MCF7 whole cell lysate using high-speed centrifugation. Fractionated cell  
21 lysates were subjected to SDS-PAGE and analyzed via immunoblot for indicated proteins. C) MCF7 cells  
22 cultured in full serum media were fixed and stained for DAPI and endogenous GREB1.  
23 Immunofluorescence microscopy was used to visualize GREB1 localization under normal growth  
24 conditions.

25 **Supplemental Figure S5- Endogenous GREB1 regulates Akt activation** MCF7 cells transduced with  
26 lentivirus expressing non-specific shRNA (shNS) or one of two shRNAs targeted to GREB1 (shGREB1  
27 #1 or shGREB1 #2) were placed in serum/phenol red free media for 16 hours followed by 1 hour of  
28 activation with 1ng/ml EGF. Cells were harvested and lysates analyzed via immunoblot for Akt activation  
29 pathway.

**A**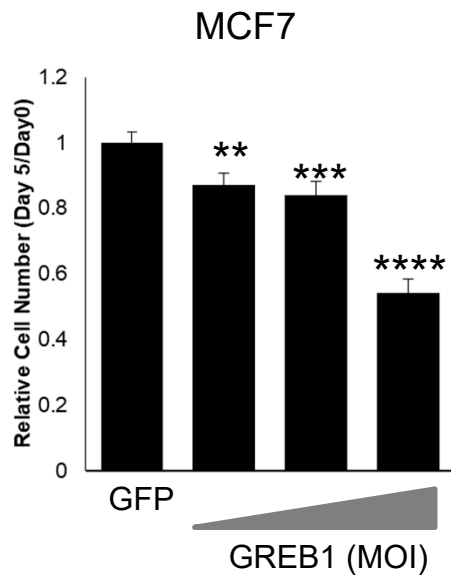**B**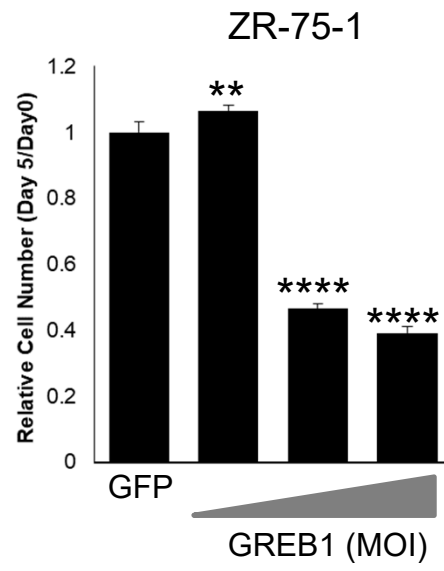

A

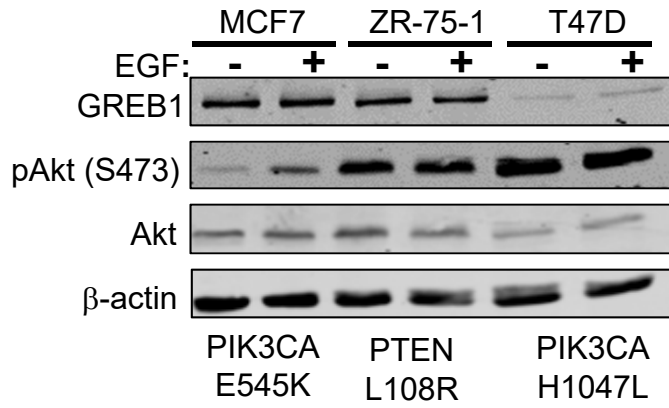

B

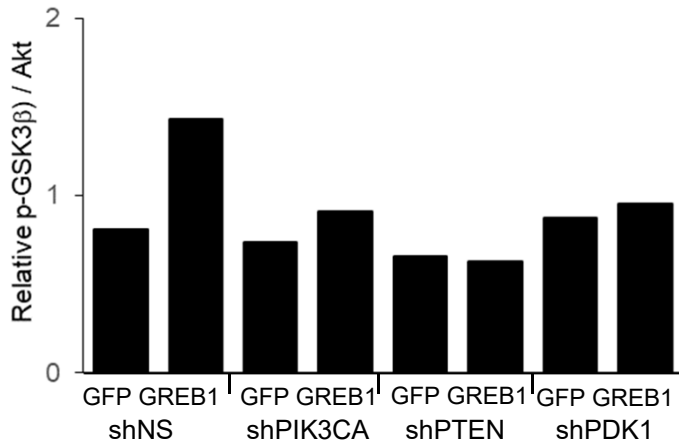

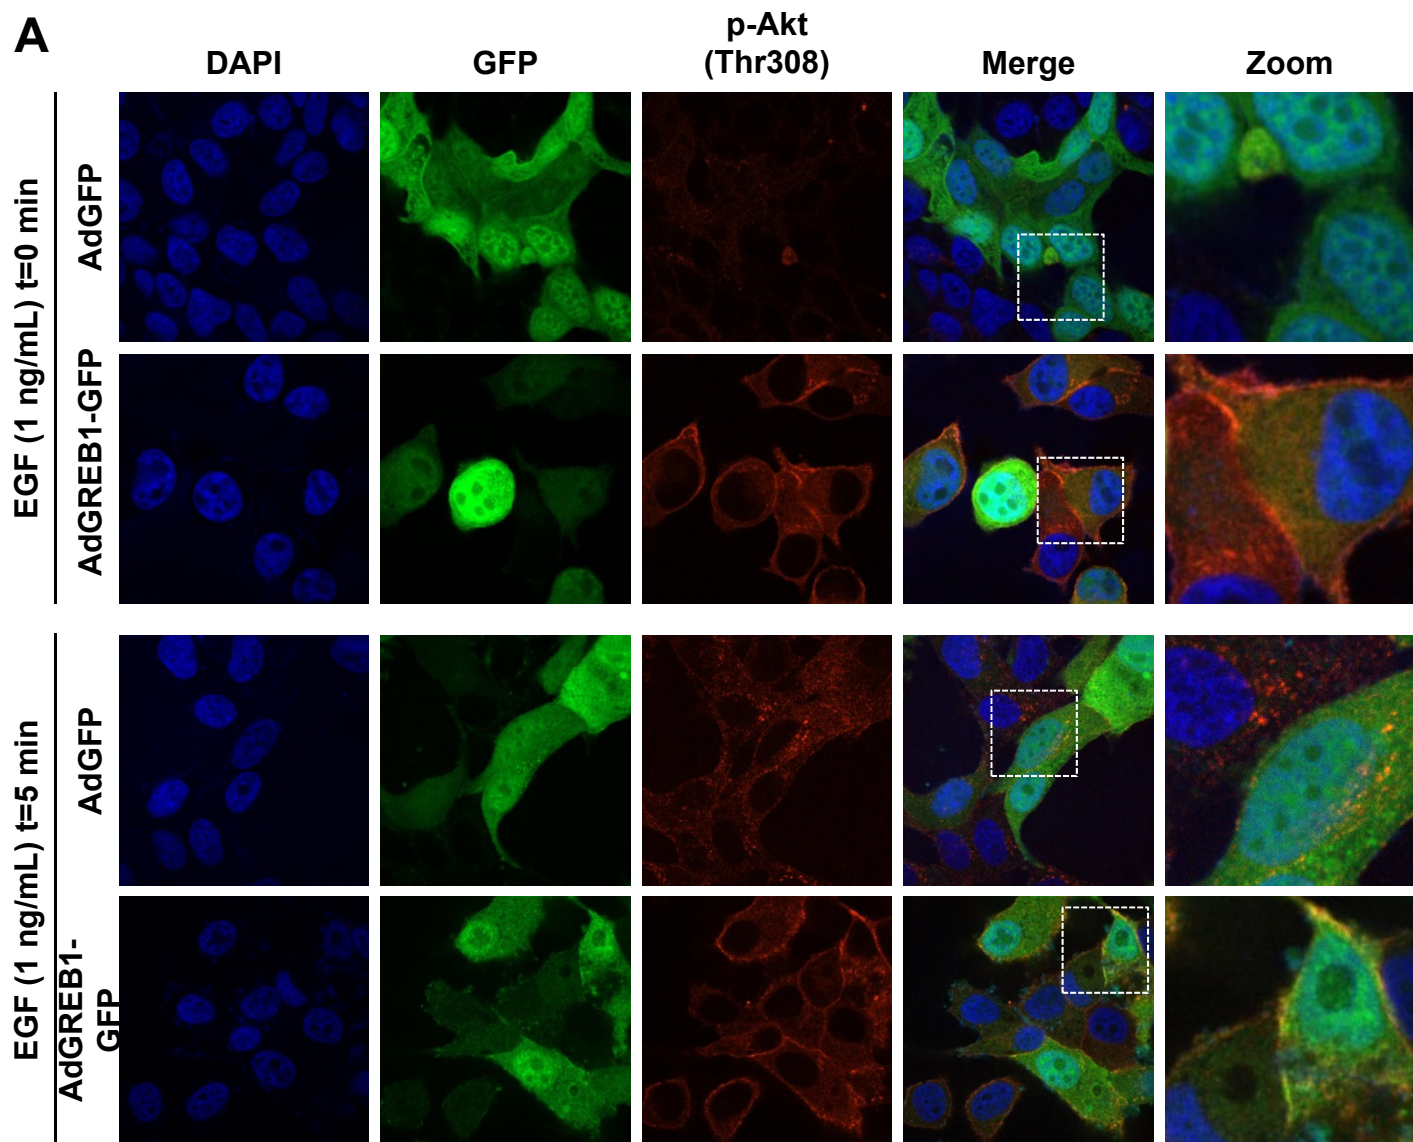

Supplemental Figure 3

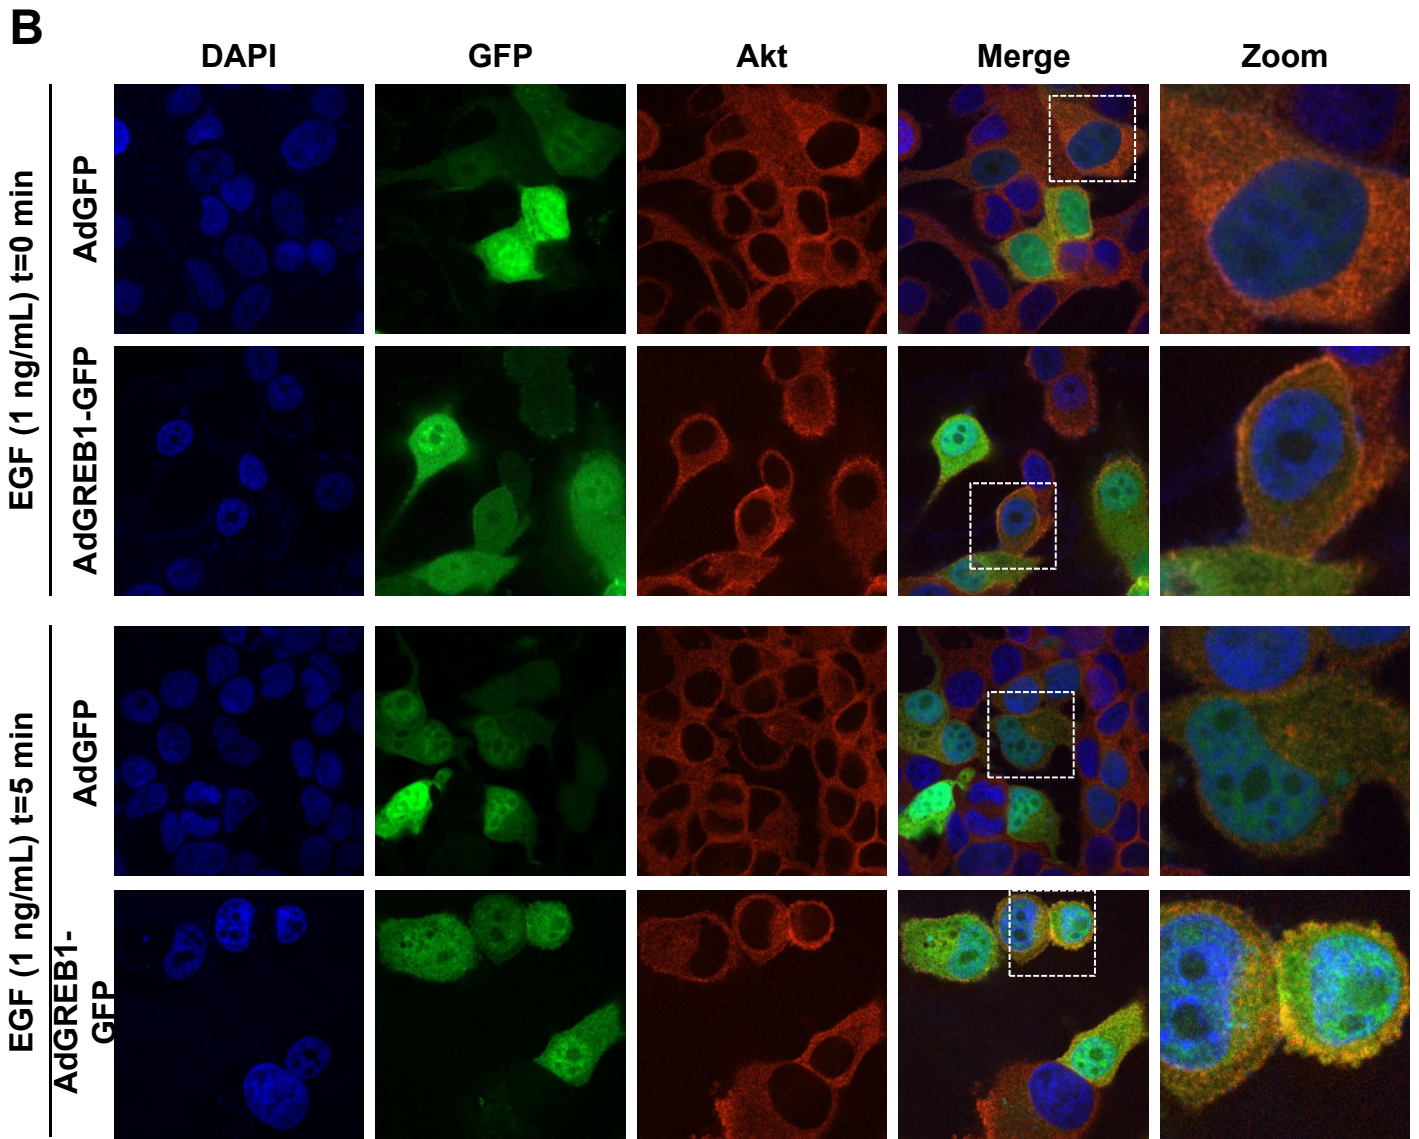

Supplemental Figure 3 (continued)

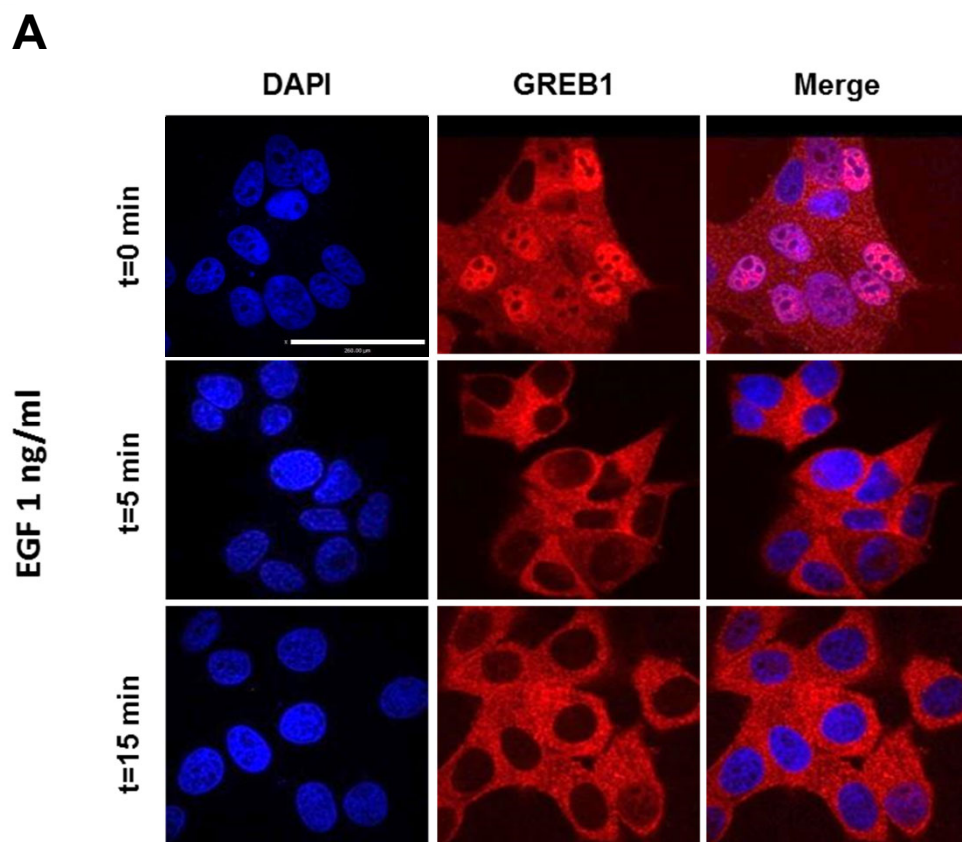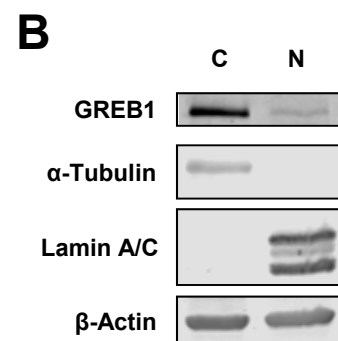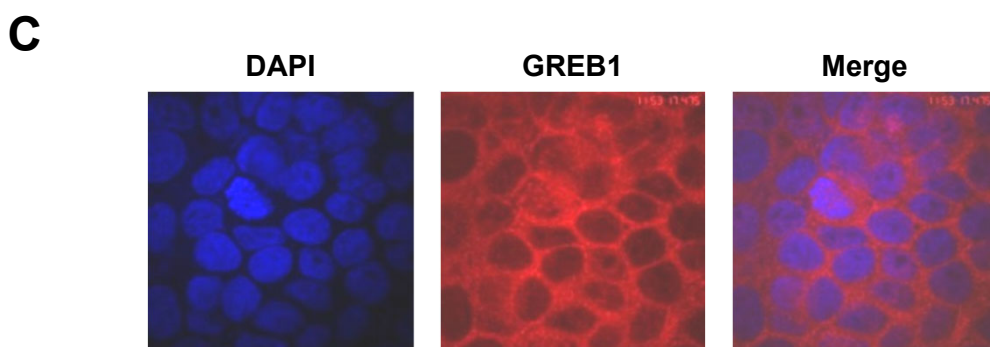

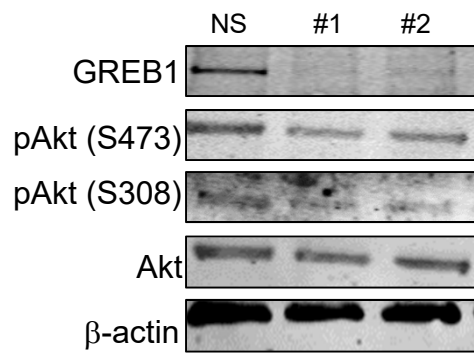

Supplement: bgaa096_suppl_supplementary_final.pdf [file bgaa096_suppl_supplementary_final.pdf]
